# Supplementary material
Source: HighWire-hosted journal article supplement (https://cmajopen.ca/highwire/filestream/84650/field_highwire_adjunct_files/3/2020-0168-original-submission.pdf)
Supplement: 2020-0168-original-submission.pdf [file 2020-0168-original-submission.pdf]

## Characterizing Frequent Emergency Department Users in BC: A retrospective analysis of linked provincial databases

Jessica Moe MD MSc MA,<sup>1</sup> Fiona O'Sullivan PhD,<sup>2</sup> Margaret J. McGregor MD MHSc,<sup>3</sup> Michael J. Schull MD MSc,<sup>4</sup> Kathryn Dong MD MSc,<sup>5</sup> Brian R. Holroyd MD MBA,<sup>6</sup> Eric Grafstein MD,<sup>7</sup> Corinne M. Hohl MD MHSc,<sup>8</sup> Johanna Trimble,<sup>9</sup> Kimberlyn M. McGrail PhD<sup>10</sup>

### *Author Affiliations*

1. Department of Emergency Medicine, University of British Columbia, Vancouver, British Columbia, Canada; Department of Emergency Medicine, Vancouver General Hospital, Vancouver, British Columbia, Canada.
2. Department of Emergency Medicine, University of British Columbia, Vancouver, British Columbia, Canada.
3. Department of Family Practice, University of British Columbia, Vancouver, British Columbia, Canada.
4. Institute for Clinical Evaluative Sciences, Toronto, Ontario, Canada; Department of Medicine, University of Toronto, Toronto, Ontario, Canada.
5. Department of Emergency Medicine, University of Alberta, Edmonton, Alberta, Canada.
6. Department of Emergency Medicine, University of Alberta, Edmonton, Alberta, Canada; Emergency Strategic Clinical Network, Alberta Health Services, Alberta, Canada.
7. Department of Emergency Medicine, University of British Columbia, Vancouver, British Columbia, Canada.
8. Department of Emergency Medicine, University of British Columbia, Vancouver, British Columbia, Canada; Department of Emergency Medicine, Vancouver General Hospital, Vancouver, British Columbia, Canada.
9. Patients for Patient Safety Canada, Roberts Creek, British Columbia, Canada.

1  
2  
3 10. School of Population and Public Health, University of British Columbia,  
4 Vancouver, British Columbia, Canada; Population Data BC, British Columbia,  
5 Canada.  
6  
7  
8  
9  
10

11 **Corresponding Author:**

12  
13 Dr. Jessica Moe

14 Department of Emergency Medicine, Vancouver General Hospital

15  
16 920 West 10<sup>th</sup> Avenue

17  
18 Vancouver, British Columbia, CANADA, V5Z 1M9

19  
20 Telephone: 236-982-6805

21  
22 Email: [jessica.moe@gmail.com](mailto:jessica.moe@gmail.com)  
23  
24  
25  
26  
27

28 **Funding Statement:** This study received funding from the Vancouver Coastal Health  
29 Research Institute.  
30  
31

32  
33  
34 **Competing Interests:** None to declare.  
35  
36  
37  
38

39 **Word Count:** 2500 words; Tables: 2; Figures: 0; References: 53.  
40  
41  
42  
43  
44  
45  
46  
47  
48  
49  
50  
51  
52  
53  
54  
55  
56  
57  
58  
59  
60

# Characterizing Frequent Emergency Department Users in BC: A retrospective analysis of linked provincial databases

## ABSTRACT

### Background

This study aimed to characterize frequent emergency department (ED) users in British Columbia (BC) using provincial data.

### Methods

We identified patients  $\geq 18$  years who made  $\geq 1$  ED visit from 2012/13-2015/16, and linked to hospitalization, physician billing, prescription, and mortality data. We defined frequent users as the top 10% of patients by annual ED visits.

### Results

From 2012/13 to 2015/16, frequent users' visits increased by 63.3% (95% CI: 61.5%, 65.0%), compared to 47.5% (95% CI: 46.7%, 48.3%) for ED visits overall. Frequent users accounted for 17.8-19.7% of visits, with a median of six/year (interquartile interval [IQI]: 5-8). Only 1.51% remained frequent users in all years. Mental illness was prevalent among those  $< 60$  years, and circulatory and respiratory complaints among those  $\geq 60$  years.

In 2015/16, frequent users were older than non-frequent users, more frequently resided in the lowest two quintiles of average household incomes, and had similar sex distributions. They had more prescription medications (median 11 [IQI: 6-17] versus 5 [IQI: 2-9],  $p < 0.001$ ), visited more unique primary care physicians (median 9 [IQI: 6-13] versus 3 [IQI: 2-5],  $p < 0.001$ ) and received less care continuity. Annual hospitalizations (median 2 [IQI: 1-4] versus 1 [IQI: 1-2],  $p < 0.001$ ), and 365-day mortality (12.9% versus 4.1%,  $p < 0.001$ ) were higher among frequent versus non-frequent users.

### Interpretation

1  
2  
3  
4  
5  
6  
7  
8  
9  
10  
11  
12  
13  
14  
15  
16  
17  
18  
19  
20  
21  
22  
23  
24  
25  
26  
27  
28  
29  
30  
31  
32  
33  
34  
35  
36  
37  
38  
39  
40  
41  
42  
43  
44  
45  
46  
47  
48  
49  
50  
51  
52  
53  
54  
55  
56  
57  
58  
59  
60

Frequent ED users' visits are increasing in BC. They are heterogenous, high utilizers of other healthcare, and have higher mortality than non-frequent users. Frequent use is rarely persistent. Future efforts to address frequent ED use should account for this heterogeneity and complexity.

Confidential

## INTRODUCTION

Health expenditures in Canada continue to grow year over year; Canadians spent \$7068 per capita on healthcare in 2019 with emergency department (ED) expenses accounting for an increasing proportion of costs.<sup>1,2</sup> High healthcare users have been identified as a national priority for cost containment.<sup>3,4</sup> Specifically, frequent ED users comprise 4.5-8% of ED patients, yet account for 21-30% of visits.<sup>5,6</sup> They are high users of other healthcare services and incur disproportionately high healthcare costs.<sup>7-9</sup> Existing literature suggests they are also high-risk: they make higher acuity visits, and are admitted and die more often than non-frequent users.<sup>10-14</sup>

Effective solutions require a detailed and generalizable understanding of frequent ED users in Canada. Most characterization studies have been conducted at institution levels and other countries.<sup>15-20</sup> Previous provincial analyses in Canada have examined frequent users in a cross-sectional rather than longitudinal manner.<sup>9,21,22</sup> Population-level temporal trends and transitions into and out of frequent ED use have not been explored.

Interventions described to-date (e.g., case management and care plans) may decrease ED visits.<sup>17,19,23</sup> However, their effectiveness has not been rigorously studied in Canada. Sustainable solutions require a nuanced understanding of the nature (not just quantity) of frequent ED users' healthcare system interactions. For instance, the proposed solution of greater linkages to primary care contradicts evidence that over 93% of North American frequent ED users are already attached to primary care.<sup>15,24-28</sup> Liaising frequent users with primary care providers at discharge has had mixed effects on ED use.<sup>29,30</sup> It is unknown whether improving the quality of the primary care relationship can redirect frequent users towards non-acute care and improve outcomes.

This study's objective was to characterize frequent ED users in British Columbia (BC) using a comprehensive, longitudinal, linked provincial database of demographic, clinical, and healthcare utilization data.

## METHODS

### *Study Design, Setting and Participants*

This was a retrospective administrative database study capturing patients who visited an ED in BC between 2012/13 and 2015/16. Data were split into four fiscal years groupings. The **study cohort** was created by identifying all patients aged  $\geq 18$  years who made at least one ED visit during the study timeframe. We identified ED visits based on classification within the National Ambulatory Care Reporting System (NACRS) database.<sup>31</sup>

### *Data Sources*

We created a study database by linking patient-level data for our cohort (NACRS) to hospitalization (Discharge Abstract Database [DAD]),<sup>32</sup> physician billing (Medical Services Plan [MSP]),<sup>33</sup> prescription medications (PharmaNet),<sup>34</sup> and mortality (Vital Statistics) data.<sup>35</sup> Population Data BC housed and linked all databases using personal health number, age, sex, and postal code as linkage variables. All patients were assigned non-identifiable study numbers that remained consistent across databases. The University of British Columbia Clinical Research Ethic Board approved this study.

### *Study variables and definitions*

#### *Frequent Users*

Frequent users were defined as patients within our cohort in the top 10% of ED utilization in each fiscal year, consistent with a Canadian Institute for Health Information (CIHI) definition.<sup>36</sup>

To determine visit counts, we first attempted to identify and remove scheduled revisits. Based on our clinical experience, the majority of scheduled ED revisits in BC are made for intravenous antibiotics for cellulitis. We therefore defined strings of ED visits within 48

1  
2  
3 hours of one another with an initial diagnosis of cellulitis as presumed scheduled revisits.  
4 We examined the diagnostic categories of all ED visits that occurred within 48 hours of  
5 one another and confirmed that no diagnoses other than cellulitis commonly appeared.  
6  
7  
8  
9  
10

### 11 *Non-Frequent Users*

12  
13 We defined non-frequent users as patients in the bottom 90% of ED utilization in each  
14 fiscal year, based on visit totals after removing presumed scheduled revisits.  
15  
16  
17  
18  
19

### 20 *Demographics*

21  
22 Sex, age, rural/urban residence, and average neighbourhood income adjusted for  
23 household size<sup>37</sup> were available for frequent and non-frequent users. Population  
24 estimates were obtained from the Government of British Columbia.<sup>38</sup>  
25  
26  
27  
28  
29  
30

### 31 *Acute Care*

32  
33 ED visit characteristics (ambulance arrival, triage level, diagnoses, disposition) were  
34 available through NACRS.  
35  
36

37 Visit acuity is defined using the Canadian Triage and Acuity Scale (CTAS), a national tool  
38 that allows Canadian EDs to prioritize patient care.<sup>39</sup> It defines five illness acuity levels  
39 with differing time-to-physician goals.<sup>40</sup>  
40  
41  
42

43 We obtained hospitalization dates and diagnoses from DAD.  
44  
45  
46  
47

### 48 *Physician Visits and Majority Source of Care*

49  
50 We used the general practitioner specialty code to identify primary care providers and  
51 visits using MSP data.  
52  
53  
54  
55  
56  
57  
58  
59  
60

1  
2  
3 We counted both number of visits to primary care physicians and number of unique  
4 primary care physicians seen. To describe continuity of primary care, we calculated a  
5 majority source of care variable based on whether the patient received at least three  
6 services in one year, and at least 50% of services from one general practitioner.<sup>42,43</sup>  
7  
8  
9

### 10 11 12 13 *Mortality*

14  
15 We obtained dates and causes for death in the Vital Statistics database, and examined  
16 mortality by sex, age, and age groups.  
17  
18  
19

### 20 21 22 *Diagnostic Categories*

23  
24 ED, hospitalization, and mortality diagnoses are recorded within NACRS, DAD and Vital  
25 Statistics using the International Statistical Classification of Diseases and Related Health  
26 Problems 10<sup>th</sup> Revision (ICD-10). The ICD-10 classification system comprises 22  
27 diagnostic chapters, within which specific diagnoses are listed. We summarized frequent  
28 and non-frequent users' diagnoses within diagnostic categories (i.e. ICD-10 chapters).<sup>41</sup>  
29  
30  
31  
32  
33  
34  
35

### 36 37 *Prescription Medications*

38  
39 Using the provincial PharmaNet database, we defined unique medications as those with  
40 distinct generic drug names, consistent with previous literature.<sup>44</sup> We summarized unique  
41 medication counts by age groups, and also medication categories using American  
42 Hospital Formulary Service (AHFSC) classifications.  
43  
44  
45  
46  
47

### 48 49 *Analyses*

50  
51 We characterized our frequent user and non-frequent user groups for each fiscal year,  
52 using all data sources available. We reported descriptive statistics based on the type and  
53 distribution of each variable. We calculated percentage change in ED visit numbers  
54 overall and for visits made by frequent users over the study period, standardized for  
55  
56  
57  
58  
59  
60



1  
2  
3 annual BC population. We used chi-square tests for categorical variables and Wilcoxon  
4 rank-sum tests for continuous variables to evaluate statistical significance.  
5  
6

7 All analyses were performed using R (R Development Core Team, 2011). We used an  
8 alpha<0.05 threshold for significance.  
9  
10

## 11 12 13 **RESULTS** 14 15

16  
17 From 2012/13 to 2015/16, visits made by frequent users increased from 136,960 to  
18 233,866 and accounted for 17.8% to 19.7% of total ED visits. Frequent ED users' visits  
19 increased from 2999.06/100,000 population to 4896.29/100,000 population, an absolute  
20 increase of 63.3% (95% CI: 61.5%, 65.0%). In comparison, total ED visits rose from  
21 16,818.04/100,000 population to 24,805.54/100,000, an increase of 47.5% (95% CI:  
22 46.7%, 48.3%). The top 10% of users made a median of six annual ED visits (interquartile  
23 interval [IQI]: 5, 8). Visits related to mental illness and injury/poisoning were prevalent  
24 among frequent users aged 18 to 60 years. Proportionally, visits attributable to mental  
25 illness and injury increased from 2012/13 to 2015/16. Frequent users  $\geq 60$  years old  
26 proportionally made more visits related to circulatory and respiratory disorders (Table 1).  
27  
28  
29  
30  
31  
32  
33  
34  
35

36 A minority of patients classified as frequent ED users each year remained so in the year  
37 that immediately followed (11.7%, 11.7% and 12.7% respectively in 2012/13, 2013/14  
38 and 2014/15). Only 15.7% of patients were frequent users in multiple consecutive or non-  
39 consecutive years. Furthermore, only 1.51% of patients remained frequent users in all  
40 study years; 1.91% remained frequent users in all years when only examining those who  
41 were alive during the entire study.  
42  
43  
44  
45  
46  
47

48 We report frequent users' characteristics in 2015/16, our most recent year of data, and  
49 compare them to non-frequent users (Table 2). Frequent users were older than non-  
50 frequent users (median 54.0 years [IQI: 36, 73] versus 50.5 years [IQI: 33, 67],  $p < 0.001$ ),  
51 and disproportionately represented neighborhood incomes (measured by average  
52 household income) in the lowest two quintiles (52% versus 43%,  $p < 0.001$ ). There was no  
53  
54  
55  
56  
57  
58  
59  
60

1  
2  
3 difference in sex distribution between frequent and non-frequent users (52% female in  
4 both groups,  $p=0.053$ ).  
5  
6  
7

8 When comparing ED visit characteristics, frequent users arrived more commonly by  
9 ambulance (30% versus 20%,  $p<0.001$ ), made a greater proportion of higher acuity visits  
10 ( $p<0.001$ ), and were admitted more often (18.9% versus 15.3%,  $p<0.001$ ) than non-  
11 frequent users. The most common ED discharge diagnoses for both frequent and non-  
12 frequent users related to a broad category encompassing a range of clinical findings, such  
13 as abdominal pain, chest pain, headache, fever, and hyperglycemia.<sup>41</sup> Mental and  
14 behavioral disorders accounted for 8% of frequent users' visits. Frequent users had a  
15 greater number of annual admissions compared to non-frequent users (median 2 [IQR: 1,  
16 4] versus median 1 [IQR: 1, 2],  $p<0.001$ ). The most common reasons for hospitalization  
17 were mental and behavioural disorders for frequent users (19%), versus circulatory  
18 diseases for non-frequent users (17%).  
19  
20  
21  
22  
23  
24  
25  
26  
27  
28

29 In 2015/16, frequent ED users made a median of 22 primary care visits (IQR: 13, 38) to a  
30 median of nine unique primary care physicians (IQR: 6, 13). By contrast, non-frequent  
31 users made a median of eight primary care visits (IQR: 4, 13) to a median of three unique  
32 primary care physicians (IQR: 2, 4). Among frequent users, 36.5% had a practitioner who  
33 served as their majority source of care, compared to 42.5% among non-frequent users  
34 ( $p<0.001$ ). Only 0.4% (137/30,777) of frequent users had made no primary care visits,  
35 and only 1.1% (325/30,777) had made two or fewer visits. Frequent users had a higher  
36 number of prescription medications compared to non-frequent users (median 11 [IQR: 6,  
37 17] versus 5 [IQR: 2, 9],  $p<0.001$ ).  
38  
39  
40  
41  
42  
43  
44  
45

46 Frequent ED users had a higher mortality rate within one year of their last ED visit in  
47 2015/16 compared to non-frequent users (12.9% versus 4.1%,  $p<0.001$ ), with a larger  
48 proportion of deaths occurring in patients aged <70 years ( $p<0.001$ ).  
49  
50  
51  
52  
53  
54

## 55 **INTERPRETATION**

56  
57  
58  
59  
60

1  
2  
3  
4  
5 Our analyses indicate that ED visits increased uniformly in BC from 2012 to 2016, and  
6 that visits made by the top 10% of highest utilizing patients increased disproportionately.  
7 Standardized for population growth, overall ED visit rates increased by 54% from 2012  
8 to 2016, whereas ED visits by frequent users increased by 63%. Our study highlights  
9 important characteristics of frequent ED users in BC. First, frequent use tends to be  
10 transient; only 1.51% remained frequent users in all study years (1.91% among those  
11 surviving all four years). Second, frequent users are heterogenous, demonstrated by the  
12 differing predominance of ED diagnoses among age subgroups (e.g., mental health and  
13 injury among younger frequent users, and circulatory and respiratory diagnoses among  
14 older frequent users). Third, frequent ED users are high utilizers of many healthcare  
15 services. They were hospitalized more often, visited a greater number of primary care  
16 physicians, and made more primary care visits than non-frequent users. However, they  
17 experienced less continuity of primary care, consistent with prior research.<sup>45,46</sup> Finally,  
18 frequent users are complex and high-risk patients. We observed high relative numbers  
19 of prescription medications (which could indicate inappropriate prescribing and/or a  
20 large co-morbid illness burden),<sup>44</sup> high comparative admission rates, and a mortality  
21 rate over three times greater than non-frequent users (12.9% versus 4.1%).  
22  
23  
24  
25  
26  
27  
28  
29  
30  
31  
32  
33  
34  
35  
36

37 Our study confirms extensive healthcare system use among frequent ED users and thus  
38 the potential for efficiency from interventions aimed at addressing this use. Our results  
39 highlight income disparity between frequent and non-frequent users that policy  
40 interventions could target. Our analyses corroborate previous studies illustrating that  
41 frequent ED users are heterogenous, high utilizers of primary care and other services,  
42 have prevalent mental health and chronic illness, and die often.<sup>7,13,14,17,47-50</sup> Our study  
43 supports findings that very few frequent users remain so across years. A previous study  
44 of high-cost healthcare users overall indicated that one third remained high utilizers over  
45 multiple years,<sup>4</sup> while the current study found that only 15.7% of frequent users of EDs  
46 specifically remained in this category over two or more years. The relatively evanescent  
47 nature of frequent ED use may indicate that this is a naturally self-limiting state triggered  
48  
49  
50  
51  
52  
53  
54  
55  
56  
57  
58  
59  
60

1  
2  
3 by acute crisis. For clinicians who identify frequent ED use patterns, understanding  
4 contributing co-morbidities, exploring triggers for frequent use episodes and providing  
5 early intervention may shorten the duration and morbidity of these episodes.  
6  
7

8 Importantly, our results also point to an important growing prevalence of mental health  
9 and substance use among younger frequent user subgroups over time. For these  
10 subgroups, clinicians should consider initiating treatment in the ED when appropriate  
11 (e.g., opioid use disorder), and ensuring that timely and direct access to community-  
12 based treatment and supports are available from the ED.  
13  
14  
15  
16  
17  
18  
19

20 Future studies should focus on further characterizing heterogeneity and distinct  
21 subgroups of frequent ED users that are highlighted here. Previous literature has  
22 incompletely explored differential mortality risk among frequent user subgroups. This  
23 exploration is a required next step in identifying modifiable risk factors that could be  
24 mitigated to improve patient outcomes. Secondly, studies should assess predictors of  
25 episodic and persistent high ED use over multiple years, to target these populations  
26 separately for interventions. Moreover, future qualitative work should engage healthcare  
27 providers and patients within specific frequent user subgroups to understand these  
28 patients' unmet needs and underlying drivers of ED utilization, and to develop  
29 collaborative solutions. Studies should pay particular attention to understanding  
30 increasing trends in mental health and substance use presentations. Finally, clinicians,  
31 hospitals and regions should pilot targeted approaches to address frequent users'  
32 heterogeneous needs, utilizing non-ED settings where possible. These directed  
33 interventions include: strategies to improve continuity of primary care, targeted mental  
34 health or substance use follow-up, medication reviews for frequent users with  
35 polypharmacy (especially if multiple prescribers), and chronic disease management for  
36 elderly patients coordinated with a most responsible primary care provider.  
37  
38  
39  
40  
41  
42  
43  
44  
45  
46  
47  
48  
49  
50  
51

## 52 ***Limitations***

53  
54  
55  
56  
57  
58  
59  
60

1  
2  
3 Our study has limitations inherent in large administrative database analyses. We relied  
4 on NACRS ED records to create our study cohort. The observed increase in ED visits  
5 partially reflects an increase in number of institutions reporting to NACRS: from 20 in  
6 2012/13 to 29 by 2013/14.<sup>31</sup> Our approach may disproportionately identify EDs in larger  
7 urban/suburban centres reporting to NACRS, while missing visits to non-reporting  
8 institutions. Nonetheless, NACRS is the most comprehensive provincial repository of  
9 ED visits, increasing the robustness of our analysis. By 2015/16, our most recent year  
10 of data, 29 BC EDs contributed 1.57 million records, accounting for a 74% provincial  
11 coverage rate.<sup>51</sup> Secondly, while a scheduled ED revisit flag exists within NACRS, it is  
12 unreliably coded. We therefore developed an algorithm to identify presumed revisits for  
13 cellulitis treatment, based on our clinical experience. Our algorithm is unvalidated;  
14 however, we explored all ED visits within 48 hours of one another, and cellulitis was the  
15 only commonly appearing diagnosis. Thirdly, we could not explore important variables  
16 not captured in the included databases (e.g., homelessness, employment, ethnicity,  
17 individual/family income). Fourth, while a graded analysis of frequent use would  
18 strengthen our analysis, we chose to examine the top 10% of users to remain consistent  
19 with CIHI standards. Finally, our analyses will be affected by accuracy and  
20 completeness of available data. We observed 28.7% and 29.3% missing data for  
21 discharge diagnoses for frequent and non-frequent users, respectively; while high, we  
22 do not suspect a systematic difference between groups. To mitigate coding  
23 inconsistencies, we collapsed diagnosis information into ICD-10 chapters, a previously  
24 supported approach.<sup>52,53</sup>

## 44 **Conclusion**

45  
46 In conclusion, ED utilization by the top 10% of highest ED users is a substantial and  
47 growing issue in BC. These patients are heterogeneous, high users of multiple facets of  
48 healthcare, and high-risk for mortality. Frequent use is rarely persistent over multiple  
49 years. Interventions that permit early identification of frequent ED users and that  
50 systematically address needs and triggers for frequent use episodes have the potential  
51 for health system efficiencies and more importantly, improved patient outcomes.  
52  
53  
54  
55  
56  
57  
58  
59  
60

1  
2  
3  
4  
5  
6  
7  
8  
9  
10  
11  
12  
13  
14  
15  
16  
17  
18  
19  
20  
21  
22  
23  
24  
25  
26  
27  
28  
29  
30  
31  
32  
33  
34  
35  
36  
37  
38  
39  
40  
41  
42  
43  
44  
45  
46  
47  
48  
49  
50  
51  
52  
53  
54  
55  
56  
57  
58  
59  
60

**Funding Source:** This study received funding from the Vancouver Coastal Health Research Institute.

Confidential

## REFERENCES

1. Canadian Institute for Health Information. National health expenditure trends, 1975 to 2019. 2019.
2. Canadian Institute for Health Information. Hospital cost drivers technical report - what factors have determined hospital expenditure trends in Canada? 2012.
3. Canadian Institute for Health Information. Pan-Canadian forum on high users of health care: Summary report. Canadian Institute for Health Information 2014 March 20-21.
4. Wodchis WP, Austin PC, Henry DA. A 3-year study of high-cost users of health care. CMAJ : Canadian Medical Association journal = journal de l'Association medicale canadienne 2016 Feb 16;188(3):182.
5. LaCalle E, Rabin E. Frequent users of emergency departments: The myths, the data, and the policy implications. Annals of Emergency Medicine 2010 Jul 1;56(1):42-48.
6. Canadian Institute for Health Information. Emergency department visits in 2014-2015. 2015.
7. Mitchell MS, Leon CLK, Byrne TH, Lin W, Bharel M. Cost of health care utilization among homeless frequent emergency department users. Psychological Services 2017 May 1;14(2):193-202.
8. Korczak V, Shanthosh J, Jan S, Dinh M, Lung T. Costs and effects of interventions targeting frequent presenters to the emergency department: A systematic and narrative review. BMC Emergency Medicine 2019 Dec;19(1):1-83.
9. Ovens HJ, Chan BT. Heavy users of emergency services: A population-based review. CMAJ : Canadian Medical Association journal = journal de l'Association medicale canadienne 2001 Oct 16;165(8):1049-1050.

10. Fuda KK, Immekus R. Frequent users of Massachusetts emergency departments: A statewide analysis. *Annals of Emergency Medicine* 2006;48(1):16.e1-16.e8.
11. Hansagi H, Olsson M, Sjöberg S, Tomson Y, Göransson S. Frequent use of the hospital emergency department is indicative of high use of other health care services. *Annals of Emergency Medicine* 2001;37(6):561-567.
12. Moe J, Kirkland S, Ospina MB, Campbell S, Long R, Davidson A, et al. Mortality, admission rates and outpatient use among frequent users of emergency departments: A systematic review. *Emergency Medicine Journal* 2016 Mar;33(3):230-236.
13. Pines JM, Asplin BR, Kaji AH, Lowe RA, Magid DJ, Raven M, et al. Frequent users of emergency department services: Gaps in knowledge and a proposed research agenda. *Academic Emergency Medicine* 2011 Jun;18(6):e64-e69.
14. Ruger JP, Richter CJ, Spitznagel EL, Lewis LM. Analysis of costs, length of stay, and utilization of emergency department services by frequent users: Implications for health policy. *Academic Emergency Medicine* 2004 Dec;11(12):1311-1317.
15. Ovens HJ, Chan BT. Heavy users of emergency services: A population-based review. *Canadian Medical Association Journal* 2001 Oct 16;165(8):1049-1050.
16. van Tiel S, Rood P, Bertoli-Avella A, Erasmus V, Haagsma J, van Beeck E, et al. Systematic review of frequent users of emergency departments in non-US hospitals: State of the art. *European Journal of Emergency Medicine* 2015 Oct;22(5):306-315.
17. Soril LJJ, Leggett LE, Lorenzetti DL, Noseworthy TW, Clement FM. Reducing frequent visits to the emergency department: A systematic review of interventions. *PloS one* 2015;10(4):e0123660.
18. Dufour I, Chouinard M, Dubuc N, Beaudin J, Lafontaine S, Hudon C. Factors associated with frequent use of emergency-department services in a geriatric population: A systematic review. *BMC geriatrics* 2019 Jul 5;19(1):185.



- 1  
2  
3 19. Moe J, Kirkland SW, Rawe E, Ospina MB, Vandermeer B, Campbell S, et al.  
4 Effectiveness of interventions to decrease emergency department visits by adult  
5 frequent users: A systematic review. *Academic Emergency Medicine* 2017  
6 Jan;24(1):40-52.  
7  
8
- 9  
10  
11 20. Althaus F, Paroz S, Hugli O, Ghali WA, Daeppen J, Peytremann-Bridevaux I, et al.  
12 Effectiveness of interventions targeting frequent users of emergency departments: A  
13 systematic review. *Annals of Emergency Medicine* 2011;58(1):41-52.e42.  
14  
15
- 16  
17 21. Chan BTB, Ovens HJ. Frequent users of emergency departments. do they also use  
18 family physicians' services? *Canadian Family Physician* 2002 Oct 1,;48(10):1654.  
19  
20
- 21  
22 22. Doupe MB, Palatnick W, Day S, Chateau D, Soodeen R, Burchill C, et al. Frequent  
23 users of emergency departments: Developing standard definitions and defining  
24 prominent risk factors. *Annals of Emergency Medicine* 2012 Jul;60(1):24.  
25  
26
- 27  
28 23. Kumar GS, Klein R. Effectiveness of case management strategies in reducing  
29 emergency department visits in frequent user patient populations: A systematic review.  
30 *The Journal of Emergency Medicine* 2013 Mar;44(3):717-729.  
31  
32
- 33  
34 24. Lucas RH, Sanford SM. An analysis of frequent users of emergency care at an  
35 urban university hospital. *Annals of Emergency Medicine* 1998;32(5):563-568.  
36  
37
- 38  
39 25. Sandoval E, Smith S, Walter J, Schuman SH, Olson MP, Striefler R, et al. A  
40 comparison of frequent and infrequent visitors to an urban emergency department.  
41 *Journal of Emergency Medicine* 2010;38(2):115-121.  
42  
43
- 44  
45 26. Zuckerman S, Shen Y. Characteristics of occasional and frequent emergency  
46 department users: Do insurance coverage and access to care matter? *Medical Care*  
47 2004 Feb 1,;42(2):176-182.  
48  
49
- 50  
51  
52 27. Blank FSJ, Li H, Henneman PL, Smithline HA, Santoro JS, Provost D, et al. A  
53 descriptive study of heavy emergency department users at an academic emergency  
54  
55  
56  
57  
58  
59  
60

1  
2  
3 department reveals heavy ED users have better access to care than average users.  
4 Journal of Emergency Nursing 2005;31(2):139-144.  
5  
6

7  
8 28. Palmer E, Leblanc-Duchin D, Murray J, Atkinson P. Emergency department use: Is  
9 frequent use associated with a lack of primary care provider? Canadian family physician  
10 Médecin de famille canadien 2014 Apr;60(4):e223.  
11  
12

13  
14 29. McCusker J, Verdon J. Do geriatric interventions reduce emergency department  
15 visits? A systematic review. The journals of gerontology. Series A, Biological sciences  
16 and medical sciences 2006 Jan;61(1):53-62.  
17  
18

19  
20 30. Hastings SN, Heflin MT. A systematic review of interventions to improve outcomes  
21 for elders discharged from the emergency department. Academic Emergency Medicine  
22 2005 Oct;12(10):978-986.  
23  
24

25  
26 31. Population Data BC. National Ambulatory Care Reporting System (NACRS). 2018;  
27 Available from: <https://www.popdata.bc.ca/data/health/nacrs>. [cited June 18, 2020].  
28  
29

30  
31 32. Population Data BC. Discharge Abstracts Database (Hospital Separations file).  
32 2018; Available from: <https://www.popdata.bc.ca/data/health/dad>. [cited April 29, 2020].  
33  
34

35  
36 33. Population Data BC. Medical Services Plan (MSP) Payment Information File. 2018;  
37 Available from: <https://www.popdata.bc.ca/data/health/msp>. [cited April 29, 2020].  
38  
39

40  
41 34. Population Data BC. PharmaNet. 2019; Available from:  
42 <https://www.popdata.bc.ca/data/health/PharmaNet>. [cited April 29, 2020].  
43  
44

45  
46 35. Population Data BC. Population and vital statistics. 2018; Available from:  
47 <https://www.popdata.bc.ca/data/population>. [cited April 29, 2020].  
48  
49

50  
51 36. Canadian Institute for Health Information. Dynamic cohort of complex, high system  
52 users - 2011-2015: A CIHR-CIHI collaboration. CIHR-CIHI 2017.  
53  
54  
55  
56  
57  
58  
59  
60

- 1  
2  
3 37. Statistics Canada. Postal code conversion file (PCCF),  
4 reference guide, 2017. 2017 December 13.  
5  
6  
7  
8 38. Government of British Columbia. Population Estimates - Province of British  
9 Columbia. 2020; Available from:  
10 [https://www2.gov.bc.ca/gov/content/data/statistics/people-population-](https://www2.gov.bc.ca/gov/content/data/statistics/people-population-community/population/population-estimates)  
11 [community/population/population-estimates](https://www2.gov.bc.ca/gov/content/data/statistics/people-population-community/population/population-estimates). [cited April 19, 2020].  
12  
13  
14  
15  
16 39. CTAS National Working Group. CTAS - ETG: Canadian Triage and Acuity Scale.  
17 Available from: <http://ctas-phctas.ca/>. [cited April 29, 2020].  
18  
19  
20  
21 40. Beveridge R, Ducharme J, Janes L, Beaulieu S, Walter S. Reliability of the canadian  
22 emergency department triage and acuity scale: Interrater agreement . Annals of  
23 Emergency Medicine 1999 August;34(2):155-159.  
24  
25  
26  
27 41. World Health Organization. ICD-10 Version:2019. Available from:  
28 <https://icd.who.int/browse10/2019/en>. [cited April 29, 2020].  
29  
30  
31  
32 42. Lavergne R, McGrail K, Peterson S. Defining and measuring full service family  
33 practice in BC, 1991-2006. : Centre for Health Services and Policy Research, University  
34 of British Columbia; 2013.  
35  
36  
37  
38 43. Lavergne MR, Peterson S, McKendry R, Sivananthan S, McGrail K. Full-service  
39 family practice in British Columbia: Policy interventions and trends in practice, 1991-  
40 2010. Healthcare Policy/Politiques de Santé 2014 May;9(4):32-47.  
41  
42  
43  
44 44. Schneeweiss S, Seeger JD, Maclure M, Wang PS, Avorn J, Glynn RJ. Performance  
45 of comorbidity scores to control for confounding in epidemiologic studies using claims  
46 data. American Journal of Epidemiology 2001 Nov 1,;154(9):854-864.  
47  
48  
49  
50 45. Gill JM, Mainous 3, A G, Nsereko M. The effect of continuity of care on emergency  
51 department use. Archives of family medicine 2000 Apr;9(4):333-338.  
52  
53  
54  
55  
56  
57  
58  
59  
60

- 1  
2  
3 46. Ionescu-Iltu R, MSc, McCusker J, MD DrPH, Ciampi A, PhD, Vadeboncoeur A, MD,  
4 Roberge D, PhD, Larouche D, MSc, et al. Continuity of primary care and emergency  
5 department utilization among elderly people. *Canadian Medical Association Journal*  
6 2007 Nov 20,;177(11):1362-1368.  
7  
8  
9  
10  
11 47. Doupe MB, Palatnick W, Day S, Chateau D, Soodeen R, Burchill C, et al. Frequent  
12 users of emergency departments: Developing standard definitions and defining  
13 prominent risk factors. *Annals of Emergency Medicine* 2012 Jul;60(1):24.  
14  
15  
16  
17 48. Althaus F, Paroz S, Hugli O, Ghali WA, Daeppen J, Peytremann-Bridevaux I, et al.  
18 Effectiveness of interventions targeting frequent users of emergency departments: A  
19 systematic review. *Annals of Emergency Medicine* 2011;58(1):41-52.e42.  
20  
21  
22  
23 49. T Kerr, E Wood, E Grafstein, T Ishida, K Shannon, C Lai, et al. High rates of primary  
24 care and emergency department use among injection drug users in Vancouver. *Journal*  
25 *of public health (Oxford, England)* 2005 Mar 1,;27(1):62-66.  
26  
27  
28  
29  
30 50. Moe J, Kirkland S, Ospina MB, Campbell S, Long R, Davidson A, et al. Mortality,  
31 admission rates and outpatient use among frequent users of emergency departments: A  
32 systematic review. *Emergency medicine journal : EMJ* 2016 Mar;33(3):230-236.  
33  
34  
35  
36 51. Canadian Institute for Health Information. NACRS emergency department visits  
37 and length of stay by province/territory, 2016–2017. 2017.  
38  
39  
40  
41 52. Park S. Patient complexity in primary care: Grouping systems with a special focus  
42 on validity and  
43 applications in primary care settings. UBC Department of Family Medicine 2016  
44 December 31.  
45  
46  
47  
48  
49 53. Quail JM, Lix LM, Osman BA, Teare GF. Comparing comorbidity measures for  
50 predicting mortality and hospitalization in three population-based cohorts. *BMC health*  
51 *services research* 2011 Jun 10;11(1):146.  
52  
53  
54  
55  
56  
57  
58  
59  
60

**Table 1: Characterization of Top 10% of ED Users in BC, 2012/13 to 2015/16; by Age Categories**

| <b>Characteristics</b>                                                        | <b>2012-2013</b> | <b>2013-2014</b> | <b>2014-2015</b> | <b>2015-2016</b> |
|-------------------------------------------------------------------------------|------------------|------------------|------------------|------------------|
| Total Number of ED patients                                                   | 452,405          | 559,878          | 642,987          | 670,976          |
| Total Number of ED Visits                                                     | 768,041          | 955,001          | 1,125,719        | 1,184,809        |
| Number of frequent users                                                      | 18,095           | 22,540           | 28,917           | 30,777           |
| Number of ED visits by frequent users                                         | 136,960          | 168,895          | 216,746          | 233,866          |
| <b>Total number of ED Visits/ 100,000 population in BC</b>                    | <b>16,818.04</b> | <b>20,626.03</b> | <b>23,915.33</b> | <b>24,805.54</b> |
| <b>Number of ED visits by frequent users/ 100,000 population in BC</b>        | <b>2999.06</b>   | <b>3647.78</b>   | <b>4604.66</b>   | <b>4896.29</b>   |
| Percentage of total visits attributable to frequent ED visits                 |                  |                  |                  |                  |
| <i>Top 10% ED Users</i>                                                       | 17.8             | 17.7             | 19.3             | 19.7             |
| <i>Top 5% ED Users</i>                                                        | 10.4             | 10.4             | 11.1             | 9.4              |
| <i>Top 1% ED Users</i>                                                        | 2.3              | 2.5              | 2.5              | 2.5              |
| Number of Visits, median (IQR)                                                | 6 (5, 8)         | 6 (5, 8)         | 6 (5, 8)         | 6 (5, 8)         |
| <b>Top five ED Visit Diagnostic Categories (non missing), by age category</b> |                  |                  |                  |                  |
| <b>Ages: 18-29</b>                                                            |                  |                  |                  |                  |
| Symptoms, signs and abnormal clinical and laboratory findings (XVIII)         | 3296 (15)        | 4784 (17)        | 6313 (18)        | 6777 (18)        |
| Injury, poisoning and certain other consequences of external causes (XIX)     | 2211 (10)        | 3059 (11)        | 4136 (12)        | 4720 (13)        |
| Mental and Behavioural disorders (V)                                          | 1779 (8)         | 2700 (10)        | 3502 (10)        | 4315 (12)        |

|                                                                           |           |           |           |           |
|---------------------------------------------------------------------------|-----------|-----------|-----------|-----------|
| Disease of the genitourinary system (XIV)                                 | 1138 (5)  | 1469 (5)  | 1929 (5)  | 2018 (5)  |
| Factors influencing health status and contract with health services (XXI) | 878 (4)   | 1289 (5)  | 1879 (5)  | 1918 (5)  |
| <b>Ages: 30-39</b>                                                        |           |           |           |           |
| Symptoms, signs and abnormal clinical and laboratory findings (XVIII)     | 3038 (15) | 4186 (17) | 5512 (18) | 5898 (17) |
| Injury, poisoning and certain other consequences of external causes (XIX) | 1886 (9)  | 2637 (11) | 3390 (11) | 4133 (12) |
| Mental and Behavioural disorders (V)                                      | 1756 (9)  | 2488 (10) | 3205 (10) | 4081 (12) |
| Disease of the genitourinary system (XIV)                                 | 1016 (5)  | 1314 (5)  | 1669 (5)  | 1718 (5)  |
| Factors influencing health status and contract with health services (XXI) | 990 (5)   | 1256 (5)  | 1814 (6)  | 1919 (6)  |
| <b>Ages: 40-49</b>                                                        |           |           |           |           |
| Symptoms, signs and abnormal clinical and laboratory findings (XVIII)     | 3650 (16) | 4681 (18) | 5755 (18) | 6071 (18) |
| Injury, poisoning and certain other consequences of external causes (XIX) | 2376 (10) | 2928 (11) | 3905 (12) | 4015 (12) |
| Mental and Behavioural disorders (V)                                      | 2097 (9)  | 2491 (9)  | 3292 (10) | 3877 (11) |
| Factors influencing health status and contract with health services (XXI) | 1239 (5)  | 1549 (6)  | 2139 (7)  | 2100 (6)  |

|                                                                           |           |           |           |           |
|---------------------------------------------------------------------------|-----------|-----------|-----------|-----------|
| Diseases of the musculoskeletal system and connective tissue (XIII)       | 1160 (5)  | 1377 (5)  | 1737 (5)  | 1818 (5)  |
| <b>Ages: 50-59</b>                                                        |           |           |           |           |
| Symptoms, signs and abnormal clinical and laboratory findings (XVIII)     | 3664 (16) | 4922 (17) | 6375 (18) | 6638 (17) |
| Injury, poisoning and certain other consequences of external causes (XIX) | 2117 (9)  | 2863 (10) | 3589 (10) | 4085 (11) |
| Mental and Behavioural disorders (V)                                      | 1653 (7)  | 2417 (9)  | 2756 (8)  | 3731 (10) |
| Factors influencing health status and contact with health services (XXI)  | 1134 (5)  | 1500 (5)  | 2211 (6)  | 2341 (6)  |
| Diseases of the musculoskeletal system and connective tissue (XIII)       | 1125 (5)  | 1433 (5)  | 1959 (6)  | 2105 (5)  |
| <b>Ages: 60-69</b>                                                        |           |           |           |           |
| Symptoms, signs and abnormal clinical and laboratory findings (XVIII)     | 2828 (16) | 3923 (18) | 5389 (19) | 5867 (19) |
| Injury, poisoning and certain other consequences of external causes (XIX) | 1283 (7)  | 1710 (8)  | 2430 (9)  | 2444 (8)  |
| Diseases of the Respiratory system (X)                                    | 894 (5)   | 1262 (6)  | 1640 (6)  | 1878 (6)  |
| Factors influencing health status and contact with health services (XXI)  | 675 (4)   | 1206 (6)  | 1802 (6)  | 1981 (7)  |
| Diseases of the circulatory system (IX)                                   | 777 (4)   | 1172 (5)  | 1706 (6)  | 1659 (5)  |
| <b>Ages: 70+</b>                                                          |           |           |           |           |

|    |                                     |           |           |            |
|----|-------------------------------------|-----------|-----------|------------|
| 1  |                                     |           |           |            |
| 2  |                                     |           |           |            |
| 3  |                                     |           |           |            |
| 4  | Symptoms, signs and abnormal        |           |           |            |
| 5  | clinical and laboratory findings    | 5371 (17) | 7858 (19) | 11179 (20) |
| 6  | (XVIII)                             |           |           | 12287 (21) |
| 7  |                                     |           |           |            |
| 8  | Diseases of the circulatory         |           |           |            |
| 9  | system (IX)                         | 1874 (6)  | 3077 (8)  | 4615 (8)   |
| 10 |                                     |           |           | 4851 (8)   |
| 11 |                                     |           |           |            |
| 12 | Injury, poisoning and certain other |           |           |            |
| 13 | consequences of external causes     | 2022 (6)  | 2790 (7)  | 3982 (7)   |
| 14 | (XIX)                               |           |           | 4098 (7)   |
| 15 |                                     |           |           |            |
| 16 | Diseases of the Respiratory         |           |           |            |
| 17 | system (X)                          | 1366 (4)  | 2005 (5)  | 3131 (6)   |
| 18 |                                     |           |           | 3502 (6)   |
| 19 |                                     |           |           |            |
| 20 | Disease of the genitourinary        |           |           |            |
| 21 | system (XIV)                        | 1364 (4)  | 1958 (5)  | 2928 (5)   |
| 22 |                                     |           |           | 3200 (5)   |
| 23 |                                     |           |           |            |
| 24 |                                     |           |           |            |
| 25 |                                     |           |           |            |
| 26 |                                     |           |           |            |
| 27 |                                     |           |           |            |
| 28 |                                     |           |           |            |
| 29 |                                     |           |           |            |
| 30 |                                     |           |           |            |
| 31 |                                     |           |           |            |
| 32 |                                     |           |           |            |
| 33 |                                     |           |           |            |
| 34 |                                     |           |           |            |
| 35 |                                     |           |           |            |
| 36 |                                     |           |           |            |
| 37 |                                     |           |           |            |
| 38 |                                     |           |           |            |
| 39 |                                     |           |           |            |
| 40 |                                     |           |           |            |
| 41 |                                     |           |           |            |
| 42 |                                     |           |           |            |
| 43 |                                     |           |           |            |
| 44 |                                     |           |           |            |
| 45 |                                     |           |           |            |
| 46 |                                     |           |           |            |
| 47 |                                     |           |           |            |
| 48 |                                     |           |           |            |
| 49 |                                     |           |           |            |
| 50 |                                     |           |           |            |
| 51 |                                     |           |           |            |
| 52 |                                     |           |           |            |
| 53 |                                     |           |           |            |
| 54 |                                     |           |           |            |
| 55 |                                     |           |           |            |
| 56 |                                     |           |           |            |
| 57 |                                     |           |           |            |
| 58 |                                     |           |           |            |
| 59 |                                     |           |           |            |
| 60 |                                     |           |           |            |

Confidential



**Table 2: Characteristics of frequent (top 10%) and non-frequent (bottom 90%) ED users in BC, 2015-2016**

| <b>Characteristics</b>                | <b>Frequent ED Users</b> | <b>Non-Frequent ED Users</b> | <b>p-value</b> |
|---------------------------------------|--------------------------|------------------------------|----------------|
| <b>Total Patient Number, n</b>        | <b>30,777</b>            | <b>640,199</b>               |                |
| <b>Sex</b>                            |                          |                              |                |
| <i>Female, n (%)</i>                  | 15,855 (52)              | 333,412 (52)                 | 0.053          |
| <i>Male, n (%)</i>                    | 14,919 (48)              | 306,702 (48)                 |                |
| <i>Unknown, n (%)</i>                 | 3 (0)                    | 85 (0)                       |                |
| <b>Age, median (IQR)</b>              | 54.0 (36, 73)            | 50.5 (33, 67)                | <0.001         |
| <b>Neighbourhood income Quintile</b>  |                          |                              |                |
| <i>1st Quintile, n (%)</i>            | 9571 (31)                | 140795 (22)                  | <0.001         |
| <i>2nd Quintile, n (%)</i>            | 6558 (21)                | 131333 (21)                  |                |
| <i>3rd Quintile, n (%)</i>            | 5428 (18)                | 124963 (20)                  |                |
| <i>4th Quintile, n (%)</i>            | 4755 (15)                | 122702 (19)                  |                |
| <i>5th Quintile, n (%)</i>            | 3866 (13)                | 108760 (17)                  |                |
| <b>Rural/Urban</b>                    |                          |                              |                |
| <i>Rural, n (%)</i>                   | 1285 (4)                 | 34947 (5)                    | <0.001         |
| <i>Urban, n (%)</i>                   | 29337 (96)               | 600372 (94)                  |                |
| <b>Number of Visits, median (IQR)</b> | 6 (5, 8)                 | 1 (1, 2)                     | <0.001         |
| <b>ED VISIT CHARACTERISTICS</b>       |                          |                              |                |
| <b>Arrive by Ambulance</b>            |                          |                              |                |
| <i>Ground ambulance</i>               | 69055 (30)               | 185289 (20)                  | <0.001         |
| <i>No ambulance</i>                   | 164745 (70)              | 747774 (80)                  |                |
| <b>Triage Level (CTAS)</b>            |                          |                              |                |
| <i>1 (Resuscitation)</i>              | 1654 (1)                 | 6702 (1)                     | <0.001         |
| <i>2 (Emergent)</i>                   | 41939 (18)               | 156256 (17)                  |                |
| <i>3 (Urgent)</i>                     | 119246 (51)              | 456589 (49)                  |                |
| <i>4 (Less-urgent)</i>                | 57724 (25)               | 282916 (30)                  |                |

|    |                                |                       |                        |
|----|--------------------------------|-----------------------|------------------------|
| 1  |                                |                       |                        |
| 2  |                                |                       |                        |
| 3  |                                |                       |                        |
| 4  | 5 (Non-urgent)                 | 12586 (5)             | 28547 (3)              |
| 5  | Unknown                        | 717 (0)               | 2732 (0)               |
| 6  |                                |                       |                        |
| 7  | <b>Top Five ED Visit</b>       |                       |                        |
| 8  | <b>Diagnostic Categories</b>   |                       |                        |
| 9  | <b>(ICD-10 Chapters), non-</b> |                       |                        |
| 10 | <b>missing</b>                 |                       |                        |
| 11 |                                |                       |                        |
| 12 |                                |                       |                        |
| 13 |                                | Symptoms, signs and   | Symptoms, signs and    |
| 14 |                                | abnormal clinical and | abnormal clinical and  |
| 15 |                                | laboratory findings   | laboratory findings    |
| 16 |                                | (XVIII)               | (XVIII)                |
| 17 |                                | 43538 (19)            | 165625 (18)            |
| 18 |                                |                       |                        |
| 19 |                                |                       |                        |
| 20 |                                |                       |                        |
| 21 |                                | Injury, poisoning and | Injury, poisoning and  |
| 22 |                                | certain other         | certain other          |
| 23 |                                | consequences of       | consequences of        |
| 24 |                                | external causes (XIX) | external causes (XIX)  |
| 25 |                                | 23495 (10)            | 158485 (17)            |
| 26 |                                |                       |                        |
| 27 |                                |                       |                        |
| 28 |                                |                       |                        |
| 29 |                                | Mental and            | Diseases of the skin   |
| 30 |                                | Behavioural disorders | and subcutaneous       |
| 31 |                                | (V)                   | tissue (XIII)          |
| 32 |                                | 19032 (8)             | 52541 (6)              |
| 33 |                                |                       |                        |
| 34 |                                |                       |                        |
| 35 |                                | Factors influencing   | Diseases of the        |
| 36 |                                | health status and     | Respiratory system     |
| 37 |                                | contract with health  | (XI)                   |
| 38 |                                | services (XXI)        | 41338 (4)              |
| 39 |                                | 13091 (6)             |                        |
| 40 |                                |                       |                        |
| 41 |                                |                       |                        |
| 42 |                                |                       |                        |
| 43 |                                | Diseases of the       | Diseases of the        |
| 44 |                                | musculoskeletal       | circulatory system (X) |
| 45 |                                | system and connective | 41253 (4)              |
| 46 |                                | tissue (XIV)          |                        |
| 47 |                                | 11012 (5)             |                        |
| 48 |                                |                       |                        |
| 49 |                                |                       |                        |
| 50 |                                |                       |                        |
| 51 | <b>Discharge Disposition</b>   |                       |                        |
| 52 |                                |                       |                        |
| 53 |                                |                       |                        |
| 54 |                                |                       |                        |
| 55 |                                |                       |                        |
| 56 |                                |                       |                        |
| 57 |                                |                       |                        |
| 58 |                                |                       |                        |
| 59 |                                |                       |                        |
| 60 |                                |                       |                        |

|                                                    |                                                                    |                                                                                                 |                                                    |        |
|----------------------------------------------------|--------------------------------------------------------------------|-------------------------------------------------------------------------------------------------|----------------------------------------------------|--------|
| 1<br>2<br>3<br>4<br>5<br>6<br>7                    | <i>Discharged Home or to place of residence (institution)</i>      | 187,902 (80.3)                                                                                  | 787,399 (84.3)                                     | <0.001 |
| 8<br>9<br>10                                       | <i>Left before completion of treatment</i>                         | 1754 (0.8)                                                                                      | 2943 (0.3)                                         |        |
| 11<br>12                                           | <i>Admitted or Transferred</i>                                     | 44,148 (18.9)                                                                                   | 142,682 (15.3)                                     |        |
| 13<br>14                                           | <i>Died</i>                                                        | 62 (0.0)                                                                                        | 718 (0.1)                                          |        |
| 15<br>16                                           | <b>HOSPITALIZATION DATA (DAD)</b>                                  |                                                                                                 |                                                    |        |
| 17<br>18<br>19<br>20                               | <b>Number of Admissions per person, median (IQI)</b>               | 2 (1, 4)                                                                                        | 1 (1, 2)                                           | <0.001 |
| 21<br>22<br>23                                     | <b>Median time admitted (days [IQI])</b>                           | 4 (2, 9)                                                                                        | 4 (2, 9)                                           | <0.001 |
| 24<br>25<br>26<br>27<br>28<br>29                   | <b>Top Five Primary Discharge ICD-10 Diagnosis Category, n (%)</b> |                                                                                                 |                                                    |        |
| 30<br>31<br>32<br>33<br>34<br>35<br>36             |                                                                    | Mental and behavioural disorders (F), 9181 (19)                                                 | Diseases of the circulatory system (I), 27522 (17) |        |
| 37<br>38<br>39<br>40<br>41                         |                                                                    | Diseases of the circulatory system (I), 5613 (12)                                               | Injury, poisoning (S&T), 22404 (14)                |        |
| 42<br>43<br>44<br>45<br>46                         |                                                                    | Diseases of the digestive system (K), 5191 (11)                                                 | Diseases of the digestive system (K), 21570 (13)   |        |
| 47<br>48<br>49<br>50<br>51<br>52<br>53<br>54<br>55 |                                                                    | Symptoms and abnormal clinical and laboratory findings, not otherwise classified (R), 5044 (11) | Mental and behavioural disorders (F), 16228 (10)   |        |

|                                                                         |                                                      |                                                      |        |
|-------------------------------------------------------------------------|------------------------------------------------------|------------------------------------------------------|--------|
|                                                                         | Diseases of the respiratory system (J),<br>5037 (11) | Diseases of the respiratory system (J),<br>15117 (9) |        |
| <b>PHYSICIAN BILLING DATA (MSP)</b>                                     |                                                      |                                                      |        |
| <b>Number of general practitioner visits, median (IQI)</b>              | 22 (13, 38)                                          | 8 (4, 13)                                            | <0.001 |
| <b>Number of individual general practitioners visited, median (IQI)</b> | 9 (6, 13)                                            | 3 (2, 5)                                             | <0.001 |
| <b>Majority Source of Care</b>                                          | 11,213 (36.5)                                        | 263,215 (42.5)                                       | <0.001 |
| <b>PROVINCIAL PRESCRIPTION DATA (PHARMANET)</b>                         |                                                      |                                                      |        |
| <b>Number of Drug prescription, median (IQI)</b>                        | 11 (6, 17)                                           | 5 (2, 9)                                             | <0.001 |
| <b>Number of Drugs prescriptions by age category, median (IQI)</b>      |                                                      |                                                      |        |
| <i>18-30</i>                                                            | 7 (4, 11)                                            | 3 (1, 5)                                             | <0.001 |
| <i>30-39</i>                                                            | 8 (5, 13)                                            | 3 (2, 6)                                             | <0.001 |
| <i>40-49</i>                                                            | 10 (6, 15)                                           | 4 (2, 7)                                             | <0.001 |
| <i>50-59</i>                                                            | 11 (7, 17)                                           | 5 (3, 8)                                             | <0.001 |
| <i>60-69</i>                                                            | 14 (9, 20)                                           | 6 (3, 10)                                            | <0.001 |
| <i>&gt;70</i>                                                           | 15 (10, 20)                                          | 9 (5, 13)                                            | <0.001 |
| <b>Top five AHFSC Drug Classifications, n (%)</b>                       |                                                      |                                                      |        |
|                                                                         | Central Nervous System Agents,<br>1306708 (41)       | Central Nervous System Agents,<br>5734289 (33)       |        |

|                                                         |                                                                    |                                                           |                  |
|---------------------------------------------------------|--------------------------------------------------------------------|-----------------------------------------------------------|------------------|
|                                                         | Cardiovascular drugs,<br>411435 (13)                               | Cardiovascular drugs,<br>2962239 (17)                     |                  |
|                                                         | Gastrointestinal Drugs,<br>244712 (8)                              | Hormones and<br>Synthetics<br>Substitutes,<br>1458636 (7) |                  |
|                                                         | Hormones and<br>Synthetics Substitutes,<br>185653 (6)              | Gastrointestinal<br>Drugs,<br>1187676 (7)                 |                  |
|                                                         | Blood Formation,<br>coagulation and<br>Thrombosis,<br>117562 (4)   | Electrolytic, caloric<br>and Thrombosis,<br>672281 (4)    |                  |
| <b>MORTALITY DATA<br/>(VITAL STATISTICS)</b>            |                                                                    |                                                           |                  |
| <b>Sex</b>                                              |                                                                    |                                                           |                  |
| <i>Male</i>                                             | 2200 (55)                                                          | 13797 (53)                                                | <i>0.004</i>     |
| <i>Female</i>                                           | 1782 (45)                                                          | 12452 (47)                                                |                  |
| <i>Unknown</i>                                          | 1 (0)                                                              | 17 (0)                                                    |                  |
| <b>Age when died, median<br/>(IQI)</b>                  | 76 (63, 86)                                                        | 80 (69, 89)                                               | <i>&lt;0.001</i> |
| <b>Top five causes of death<br/>by ICD-10 diagnoses</b> |                                                                    |                                                           |                  |
|                                                         | Lung Cancer (C349),<br>302 (8)                                     | Lung cancer (C349),<br>2021 (8)                           |                  |
|                                                         | Ill defined and<br>unknown cause of<br>Mortality (R99),<br>181 (5) | Unspecified Dementia<br>(F03), 1210 (5)                   |                  |
|                                                         | COPD (J449),<br>149 (4)                                            | Acute Myocardial<br>Infarction (I219),<br>1205 (5)        |                  |

|                                                           |                                                                                   |                                                                             |  |
|-----------------------------------------------------------|-----------------------------------------------------------------------------------|-----------------------------------------------------------------------------|--|
|                                                           | Heart disease of the native coronary artery (I251),<br>147 (4)                    | Heart disease of the native coronary artery (I251),<br>921 (4)              |  |
|                                                           | Unspecified Dementia (F03),<br>120 (3)                                            | Ill defined and unknown cause of Mortality (R99),<br>841 (3)                |  |
| <b>Top five causes of death by ICD-10 chapters, n (%)</b> |                                                                                   |                                                                             |  |
|                                                           | Neoplasms and diseases of blood and blood forming organs (II),<br>1512 (38)       | Neoplasms and diseases of blood and blood forming organs (II),<br>8937 (34) |  |
|                                                           | Diseases of the circulatory system (IX),<br>834 (21)                              | Diseases of the circulatory system (IX),<br>6826 (26)                       |  |
|                                                           | Diseases of the Respiratory system (X),<br>434 (11)                               | Diseases of the Digestive system (XI),<br>2662 (10)                         |  |
|                                                           | Diseases of the Digestive system (XI),<br>241 (6)                                 | Mental and Behavioural disorders (V),<br>1553 (6)                           |  |
|                                                           | Symptoms, signs and abnormal clinical and laboratory findings (XVIII),<br>181 (5) | Diseases of the skin and subcutaneous tissue (XII),<br>1273 (5)             |  |

|                                                                                                                       |             |             |        |
|-----------------------------------------------------------------------------------------------------------------------|-------------|-------------|--------|
| <b>Number of deaths within one year of last ED visit, n (%)</b>                                                       | 3983 (12.9) | 26266 (4.1) | <0.001 |
| <b>Number of deaths within one year of last ED visit (percentage per ED visit) Stratified by age at time of death</b> |             |             |        |
| <i>18-29 yrs.</i>                                                                                                     | 70 (2)      | 294 (1)     | <0.001 |
| <i>30-39 yrs.</i>                                                                                                     | 109 (3)     | 363 (1)     | <0.001 |
| <i>40-49 yrs.</i>                                                                                                     | 179 (4)     | 682 (3)     | <0.001 |
| <i>50-59 yrs.</i>                                                                                                     | 431 (11)    | 1889 (7)    | <0.001 |
| <i>60-69 yrs.</i>                                                                                                     | 720 (18)    | 3827 (15)   | <0.001 |
| <i>≥70 yrs.</i>                                                                                                       | 2474 (62)   | 19211 (73)  | <0.001 |

\*P-values calculated with chi square test for categorical variables or Wilcoxon rank test for continuous variables where appropriate.
